# Supplementary material for: Visualizing enteric nervous system activity through dye-free dynamic full-field optical coherence tomography
Source: PubMed Central journal article supplement (PMC9981581; doi:10.1038/s42003-023-04593-9), 2023-03-02
Supplement: 42003_2023_4593_MOESM2_ESM.pdf [file 42003_2023_4593_MOESM2_ESM.pdf]

## Description of Additional Supplementary Files

**File name:** Supplementary Data.

**Description:** Numerical data behind all the graphs in the paper. Data are identified in function of their figure number and panel letter.
