# Supplementary material for: Visualizing enteric nervous system activity through dye-free dynamic full-field optical coherence tomography
Source: PubMed Central journal article supplement (PMC9981581; doi:10.1038/s42003-023-04593-9), 2023-03-02
Supplement: 42003_2023_4593_MOESM4_ESM.pdf [file 42003_2023_4593_MOESM4_ESM.pdf]

## Reporting Summary

Nature Portfolio wishes to improve the reproducibility of the work that we publish. This form provides structure for consistency and transparency in reporting. For further information on Nature Portfolio policies, see our [Editorial Policies](#) and the [Editorial Policy Checklist](#).

### Statistics

For all statistical analyses, confirm that the following items are present in the figure legend, table legend, main text, or Methods section.

n/a Confirmed

- The exact sample size ( $n$ ) for each experimental group/condition, given as a discrete number and unit of measurement
- A statement on whether measurements were taken from distinct samples or whether the same sample was measured repeatedly
- The statistical test(s) used AND whether they are one- or two-sided  
*Only common tests should be described solely by name; describe more complex techniques in the Methods section.*
- A description of all covariates tested
- A description of any assumptions or corrections, such as tests of normality and adjustment for multiple comparisons
- A full description of the statistical parameters including central tendency (e.g. means) or other basic estimates (e.g. regression coefficient) AND variation (e.g. standard deviation) or associated estimates of uncertainty (e.g. confidence intervals)
- For null hypothesis testing, the test statistic (e.g.  $F$ ,  $t$ ,  $r$ ) with confidence intervals, effect sizes, degrees of freedom and  $P$  value noted  
*Give  $P$  values as exact values whenever suitable.*
- For Bayesian analysis, information on the choice of priors and Markov chain Monte Carlo settings
- For hierarchical and complex designs, identification of the appropriate level for tests and full reporting of outcomes
- Estimates of effect sizes (e.g. Cohen's  $d$ , Pearson's  $r$ ), indicating how they were calculated

*Our web collection on [statistics for biologists](#) contains articles on many of the points above.*

### Software and code

Policy information about [availability of computer code](#)

Data collection

Zen2 (blue edition) software Version 2.0.0.0 File Version 2.014283.302, Carl Zeiss microscopy GmbH, 2011  
Confocal NIS element Nikon  
FFOCT, LLTech SAS LightCT advanced

Data analysis

Light CT viewer Expert.2.3/ 0502  
Fiji v1.53q and Weka v3.3.2, icy v2.4.2.0, ec-clemv v2.2.1.0, stardist with jupyter notebook and homemade imageJmacro <https://github.com/anrcrocoval/deeplearning>  
GraphPad Prism 9, GraphPad software, LLC.

For manuscripts utilizing custom algorithms or software that are central to the research but not yet described in published literature, software must be made available to editors and reviewers. We strongly encourage code deposition in a community repository (e.g. GitHub). See the Nature Portfolio [guidelines for submitting code & software](#) for further information.

### Data

Policy information about [availability of data](#)

All manuscripts must include a [data availability statement](#). This statement should provide the following information, where applicable:

- Accession codes, unique identifiers, or web links for publicly available datasets
- A description of any restrictions on data availability
- For clinical datasets or third party data, please ensure that the statement adheres to our [policy](#)

The numerical values of the figure graph are included in the file Source Data of the supplementary information.

All dataset of the project are available from the corresponding author on reasonable request. The raw data used to generate the figures are available here <https://>

## Field-specific reporting

Please select the one below that is the best fit for your research. If you are not sure, read the appropriate sections before making your selection.

Life sciences  Behavioural & social sciences  Ecological, evolutionary & environmental sciences

For a reference copy of the document with all sections, see [nature.com/documents/nr-reporting-summary-flat.pdf](https://www.nature.com/documents/nr-reporting-summary-flat.pdf)

## Life sciences study design

All studies must disclose on these points even when the disclosure is negative.

|                 |                                                                                                                                                                                                                                                                                  |
|-----------------|----------------------------------------------------------------------------------------------------------------------------------------------------------------------------------------------------------------------------------------------------------------------------------|
| Sample size     | No sample size calculation was performed to determine the sample size, as this is to the best of our knowledge the first study using this technique. However, we used a minimum of x (3) independent biological replicates (ie animals) for each condition.                      |
| Data exclusions | no data were excluded.                                                                                                                                                                                                                                                           |
| Replication     | Experiment was replicated on different animals at different time.                                                                                                                                                                                                                |
| Randomization   | Randomization was not relevant for our study                                                                                                                                                                                                                                     |
| Blinding        | Blinding was not performed as the experimental manipulations did not require comparative groups. However, all experiments were performed and analyzed using unbiased methodology. In addition, some experiments were reproduced by more than one investigator whenever possible. |

## Behavioural & social sciences study design

All studies must disclose on these points even when the disclosure is negative.

|                   |    |
|-------------------|----|
| Study description | NA |
| Research sample   | NA |
| Sampling strategy | NA |
| Data collection   | NA |
| Timing            | NA |
| Data exclusions   | NA |
| Non-participation | NA |
| Randomization     | NA |

## Ecological, evolutionary & environmental sciences study design

All studies must disclose on these points even when the disclosure is negative.

|                          |    |
|--------------------------|----|
| Study description        | NA |
| Research sample          | NA |
| Sampling strategy        | NA |
| Data collection          | NA |
| Timing and spatial scale | NA |
| Data exclusions          | NA |

Reproducibility

Randomization

Blinding

Did the study involve field work?  Yes  No

## Reporting for specific materials, systems and methods

We require information from authors about some types of materials, experimental systems and methods used in many studies. Here, indicate whether each material, system or method listed is relevant to your study. If you are not sure if a list item applies to your research, read the appropriate section before selecting a response.

### Materials & experimental systems

| n/a                                 | Included in the study                                           |
|-------------------------------------|-----------------------------------------------------------------|
| <input type="checkbox"/>            | <input checked="" type="checkbox"/> Antibodies                  |
| <input checked="" type="checkbox"/> | <input type="checkbox"/> Eukaryotic cell lines                  |
| <input checked="" type="checkbox"/> | <input type="checkbox"/> Palaeontology and archaeology          |
| <input type="checkbox"/>            | <input checked="" type="checkbox"/> Animals and other organisms |
| <input checked="" type="checkbox"/> | <input type="checkbox"/> Human research participants            |
| <input checked="" type="checkbox"/> | <input type="checkbox"/> Clinical data                          |
| <input checked="" type="checkbox"/> | <input type="checkbox"/> Dual use research of concern           |

### Methods

| n/a                                 | Included in the study                           |
|-------------------------------------|-------------------------------------------------|
| <input checked="" type="checkbox"/> | <input type="checkbox"/> ChIP-seq               |
| <input checked="" type="checkbox"/> | <input type="checkbox"/> Flow cytometry         |
| <input checked="" type="checkbox"/> | <input type="checkbox"/> MRI-based neuroimaging |

## Antibodies

|                 |                                                                                                                                                                                                                                                                                                                                                                                                                                                                                                                                           |
|-----------------|-------------------------------------------------------------------------------------------------------------------------------------------------------------------------------------------------------------------------------------------------------------------------------------------------------------------------------------------------------------------------------------------------------------------------------------------------------------------------------------------------------------------------------------------|
| Antibodies used | Flex Polyclonal Rabbit Anti S100 Ready to use, catalog number IR504, Lot 20081562<br>Hu from human, Gift from CHU Nantes<br>Cy5-conjugated AffiniPure Goat Anti-Rabbit IgG (H+L) (minimal cross-reaction to Human, Mouse, and Rat Serum Proteins), catalog number 111-175-144, Lot Number 76449<br>Cy3-conjugated AffiniPure Donkey Anti-Human IgG (H+L) (minimal cross-reaction to Bovine, Chicken, Goat, Guinea Pig, Syrian Hamster, Horse, Mouse, Rabbit, Rat, and Sheep Serum Proteins), catalog number 709-165-149, Lot Number 48234 |
| Validation      | Flex Polyclonal Rabbit Anti S100 Ready to use, validated by International Lymphoma Study Group, validated in doi: 10.1016/j.jneuroim.2020.577422. Epub 2020 Oct 7<br>Hu from human, Gift from CHU Nantes, validated in doi: 10.1016/j.jbc.2021.101300                                                                                                                                                                                                                                                                                     |

## Eukaryotic cell lines

Policy information about [cell lines](#)

|                                                                      |                                 |
|----------------------------------------------------------------------|---------------------------------|
| Cell line source(s)                                                  | <input type="text" value="NA"/> |
| Authentication                                                       | <input type="text" value="NA"/> |
| Mycoplasma contamination                                             | <input type="text" value="NA"/> |
| Commonly misidentified lines<br>(See <a href="#">ICLAC</a> register) | <input type="text" value="NA"/> |

## Palaeontology and Archaeology

|                                                                                                                                                 |                                 |
|-------------------------------------------------------------------------------------------------------------------------------------------------|---------------------------------|
| Specimen provenance                                                                                                                             | <input type="text" value="NA"/> |
| Specimen deposition                                                                                                                             | <input type="text" value="NA"/> |
| Dating methods                                                                                                                                  | <input type="text" value="NA"/> |
| <input type="checkbox"/> Tick this box to confirm that the raw and calibrated dates are available in the paper or in Supplementary Information. |                                 |
| Ethics oversight                                                                                                                                | <input type="text" value="NA"/> |

Note that full information on the approval of the study protocol must also be provided in the manuscript.

## Animals and other organisms

Policy information about [studies involving animals](#); [ARRIVE guidelines](#) recommended for reporting animal research

|                         |                                                                                         |
|-------------------------|-----------------------------------------------------------------------------------------|
| Laboratory animals      | Male C57BL/6J Rj mice aged of 8-12 weeks                                                |
| Wild animals            | NA                                                                                      |
| Field-collected samples | NA                                                                                      |
| Ethics oversight        | No ethical approval was necessary since only terminal procedure was applied on animals. |

Note that full information on the approval of the study protocol must also be provided in the manuscript.

## Human research participants

Policy information about [studies involving human research participants](#)

|                            |    |
|----------------------------|----|
| Population characteristics | NA |
| Recruitment                | NA |
| Ethics oversight           | NA |

Note that full information on the approval of the study protocol must also be provided in the manuscript.

## Clinical data

Policy information about [clinical studies](#)

All manuscripts should comply with the ICMJE [guidelines for publication of clinical research](#) and a completed [CONSORT checklist](#) must be included with all submissions.

|                             |    |
|-----------------------------|----|
| Clinical trial registration | NA |
| Study protocol              | NA |
| Data collection             | NA |
| Outcomes                    | NA |

## Dual use research of concern

Policy information about [dual use research of concern](#)

### Hazards

Could the accidental, deliberate or reckless misuse of agents or technologies generated in the work, or the application of information presented in the manuscript, pose a threat to:

| No                                  | Yes                      |                            |
|-------------------------------------|--------------------------|----------------------------|
| <input checked="" type="checkbox"/> | <input type="checkbox"/> | Public health              |
| <input checked="" type="checkbox"/> | <input type="checkbox"/> | National security          |
| <input checked="" type="checkbox"/> | <input type="checkbox"/> | Crops and/or livestock     |
| <input checked="" type="checkbox"/> | <input type="checkbox"/> | Ecosystems                 |
| <input checked="" type="checkbox"/> | <input type="checkbox"/> | Any other significant area |

## Experiments of concern

Does the work involve any of these experiments of concern:

- | No                                  | Yes                      |                                                                             |
|-------------------------------------|--------------------------|-----------------------------------------------------------------------------|
| <input checked="" type="checkbox"/> | <input type="checkbox"/> | Demonstrate how to render a vaccine ineffective                             |
| <input checked="" type="checkbox"/> | <input type="checkbox"/> | Confer resistance to therapeutically useful antibiotics or antiviral agents |
| <input checked="" type="checkbox"/> | <input type="checkbox"/> | Enhance the virulence of a pathogen or render a nonpathogen virulent        |
| <input checked="" type="checkbox"/> | <input type="checkbox"/> | Increase transmissibility of a pathogen                                     |
| <input checked="" type="checkbox"/> | <input type="checkbox"/> | Alter the host range of a pathogen                                          |
| <input checked="" type="checkbox"/> | <input type="checkbox"/> | Enable evasion of diagnostic/detection modalities                           |
| <input checked="" type="checkbox"/> | <input type="checkbox"/> | Enable the weaponization of a biological agent or toxin                     |
| <input checked="" type="checkbox"/> | <input type="checkbox"/> | Any other potentially harmful combination of experiments and agents         |

## ChIP-seq

### Data deposition

- Confirm that both raw and final processed data have been deposited in a public database such as [GEO](#).
- Confirm that you have deposited or provided access to graph files (e.g. BED files) for the called peaks.

|                                                                            |                                 |
|----------------------------------------------------------------------------|---------------------------------|
| Data access links<br><small>May remain private before publication.</small> | <input type="text" value="NA"/> |
| Files in database submission                                               | <input type="text" value="NA"/> |
| Genome browser session<br><small>(e.g. <a href="#">UCSC</a>)</small>       | <input type="text" value="NA"/> |

### Methodology

|                         |                                                                                                                                                                                                          |
|-------------------------|----------------------------------------------------------------------------------------------------------------------------------------------------------------------------------------------------------|
| Replicates              | <input type="text" value="Describe the experimental replicates, specifying number, type and replicate agreement."/>                                                                                      |
| Sequencing depth        | <input type="text" value="Describe the sequencing depth for each experiment, providing the total number of reads, uniquely mapped reads, length of reads and whether they were paired- or single-end."/> |
| Antibodies              | <input type="text" value="Describe the antibodies used for the ChIP-seq experiments; as applicable, provide supplier name, catalog number, clone name, and lot number."/>                                |
| Peak calling parameters | <input type="text" value="Specify the command line program and parameters used for read mapping and peak calling, including the ChIP, control and index files used."/>                                   |
| Data quality            | <input type="text" value="Describe the methods used to ensure data quality in full detail, including how many peaks are at FDR 5% and above 5-fold enrichment."/>                                        |
| Software                | <input type="text" value="Describe the software used to collect and analyze the ChIP-seq data. For custom code that has been deposited into a community repository, provide accession details."/>        |

## Flow Cytometry

### Plots

Confirm that:

- The axis labels state the marker and fluorochrome used (e.g. CD4-FITC).
- The axis scales are clearly visible. Include numbers along axes only for bottom left plot of group (a 'group' is an analysis of identical markers).
- All plots are contour plots with outliers or pseudocolor plots.
- A numerical value for number of cells or percentage (with statistics) is provided.

### Methodology

|                    |                                 |
|--------------------|---------------------------------|
| Sample preparation | <input type="text" value="NA"/> |
| Instrument         | <input type="text" value="NA"/> |
| Software           | <input type="text" value="NA"/> |

Cell population abundance

Gating strategy

Tick this box to confirm that a figure exemplifying the gating strategy is provided in the Supplementary Information.

## Magnetic resonance imaging

### Experimental design

Design type

Design specifications

Behavioral performance measures

### Acquisition

Imaging type(s)

Field strength

Sequence & imaging parameters

Area of acquisition

Diffusion MRI  Used  Not used

### Preprocessing

Preprocessing software

Normalization

Normalization template

Noise and artifact removal

Volume censoring

### Statistical modeling & inference

Model type and settings

Effect(s) tested

Specify type of analysis:  Whole brain  ROI-based  Both

Statistic type for inference (See [Eklund et al. 2016](#))

Correction

### Models & analysis

n/a | Involved in the study

Functional and/or effective connectivity

Graph analysis

Multivariate modeling or predictive analysis

Functional and/or effective connectivity

*Report the measures of dependence used and the model details (e.g. Pearson correlation, partial correlation, mutual information).*

Graph analysis

*Report the dependent variable and connectivity measure, specifying weighted graph or binarized graph, subject- or group-level, and the global and/or node summaries used (e.g. clustering coefficient, efficiency, etc.).*

Multivariate modeling and predictive analysis

*Specify independent variables, features extraction and dimension reduction, model, training and evaluation metrics.*
